# Supplementary material for: Estimation of isotopologue variation of N 2 O during denitrification by Pseudomonas aureofaciens and Pseudomonas chlororaphis: Implications for N 2 O source apportionment
Source: Copernicus journal article supplement (doi:10.5194/bg-2017-463), 2017-11-16
Supplement: Supplementary file [file bg-2017-463-RC2-supplement.pdf]

The manuscript by Joshua Haslun et al. provides the application of a Rayleigh approach to determine fractionation factors  $\varepsilon$  for the multi-step  $\text{NO}_3^-$  to  $\text{N}_2\text{O}$  reduction by *Pseudomonas aureofaciens* and *Pseudomonas chlororaphis*. They observed a curvilinear relationship for  $\delta^{15}\text{N}-\text{N}_2\text{O}$  and  $\delta^{18}\text{O}-\text{N}_2\text{O}$  versus  $[-f \ln f / (1-f)]$ , which they attributed to the inter-play of fractionation factor of different enzymatic steps and diffusion of substrates and products. They provide a novel approach using non-linear least square regression to calculate net isotope effects ( $\eta$ ) for the complete reaction progress ( $f = 1$  to  $0$ ), which is of interest for the scientific community. In addition the study provides temporal trends for  $\text{N}_2\text{O}$  SP, showing that SP is a robust indicator for specific production pathways.

The manuscript is very well written and thus easy to read and understand. There are no major weaknesses or shortcomings so I suggest publication after minor revisions.

#### General comments:

The novel approach to calculate the “net isotope effect” ( $\eta$ ) is not very intuitive; therefore it should be rationalized how and why  $y = b \times e^{bx}$  (formula 5, Page 5 L14) is equivalent to  $\delta^{15}\text{N}-\text{N}_2\text{O} - \delta^{15}\text{N}-\text{NO}_3^-$  the standard approach to calculate the net isotope effect. In addition, results of the standard approach and the novel approach should be compared and discussed in the manuscript.

#### Specific comments:

Page 1 L17 ff: It should be mentioned here and elsewhere in the text that both bacterial strains lack the enzyme for  $\text{N}_2\text{O}$  reduction as this might not be known by every reader of the manuscript.

Page 4 L5: The isotopic composition of the  $\text{NaNO}_3$  should be given.

Page 4 L15: Which gas volume or range of volumes was sampled into the serum bottles?

Page 4 L26: The isotopic composition of the standards used for IRMS analysis of  $\delta^{15}\text{N}^\alpha$ ,  $\delta^{15}\text{N}^\beta$ ,  $\delta^{15}\text{N}$  and  $\delta^{18}\text{O}-\text{N}_2\text{O}$  should be given.

Page 4 L31: How was  $f$  determined? From the amount of substrate provided minus the cumulative amount of  $\text{N}_2\text{O}$  produced? Please add the respective information here.

Page 6 section 3.1 and 3.2: Please provide results for  $\eta^{15}\text{N}$  and  $\eta^{18}\text{O}$  using the standard approach to calculate net isotope effects (e.g.  $\delta^{15}\text{N}-\text{N}_2\text{O} - \delta^{15}\text{N}-\text{NO}_3^-$ ).

Page 7 L5: One experiment with *Ps. aureofaciens* and succinate at 1 mM yields  $\text{N}_2\text{O}$  with low SP similar to *Ps. chlororaphis*. How can this be explained or is it just an outlier?

Page 7 L12 – 21: This section, the application of the Rayleigh model, should be preferably placed in the introductory or method section.

Page 9 L14: The statement that SP depends on  $\delta^{15}\text{N}^\alpha$  and  $\delta^{15}\text{N}^\beta$  is trivial and could be omitted. The differences in SP between *Ps. aureofaciens* and *Ps. chlororaphis* are attributed to differences in the NO pool; which experiment could be used to check this hypothesis?

Page 8 (discussion): Temporal resolved data of  $\text{N}_2\text{O}$  isotopic composition as used in this study could be preferably be collected using an online technique, e.g. laser spectroscopy – Please comment.
